# Supplementary material
Source: HighWire-hosted journal article supplement (https://www.cmajopen.ca/highwire/filestream/87103/field_highwire_adjunct_files/0/2020-0303-1-at.pdf)
Supplement: 2020-0303-1-at.pdf [file 2020-0303-1-at.pdf]

**Appendix 1. Search strategy per database**

| <b>Database</b> | <b>Search Filter</b>                                          | <b>CIHR-strategy</b>                                                                                                                                                                    | <b>Results</b> |
|-----------------|---------------------------------------------------------------|-----------------------------------------------------------------------------------------------------------------------------------------------------------------------------------------|----------------|
| PubMed Central  | “has associated data”[filter] OR “has data citations”[filter] | ("canadian institutes of health research"[Grant Number] OR cihr[grant number] OR IRSC[grant number] OR “Instituts de recherche en sante du Canada”[Grant Number] OR IRSC[Grant Number]) | 2536           |
| PubMed          | data[filter]                                                  |                                                                                                                                                                                         | 2624           |
